# Supplementary material
Source: HighWire-hosted journal article supplement (https://jech.bmj.com/content/72/10/904)
Supplement: inline-supplementary-material-1 [file inline-supplementary-material-1.pdf]

## Appendix

ICD-codes used for identifying intact (iAAA) and ruptured abdominal aortic aneurysm (rAAA) and for comorbidity diagnosis used for adjustment in the second step regression model. "X" is replaced by any number in the ICD-code.

|                                                                    | ICD 09 (1995-1996) | ICD 10 (1997- )                                                                    |
|--------------------------------------------------------------------|--------------------|------------------------------------------------------------------------------------|
| iAAA                                                               | 4414, 441E         | I714                                                                               |
| rAAA                                                               | 4413, 441D         | I713                                                                               |
|                                                                    |                    |                                                                                    |
| Hypertension                                                       |                    | I109                                                                               |
| Hyperlipidemia                                                     |                    | E78X                                                                               |
| Diabetes Mellitus                                                  |                    | E10-E11X                                                                           |
| Stroke                                                             |                    | I61X, I63-I64X, I69X                                                               |
| Ischemic heart disease                                             |                    | I24-I25X                                                                           |
| Chronic obstructive pulmonary disorder                             |                    | J44X                                                                               |
| Renal failure                                                      |                    | N17-N19X                                                                           |
| Malignancy                                                         |                    | CXXX                                                                               |
|                                                                    |                    |                                                                                    |
| Treatment codes, included when a code for iAAA or rAAA was present |                    | JAH00, PDA10, PDG10, PDG20, PDG21, PDG22, PDG23, PDH10, PDH10, PDH21, PDQ10, PDQ21 |
|                                                                    |                    |                                                                                    |
|                                                                    |                    |                                                                                    |
|                                                                    |                    |                                                                                    |

Disposable household income was adjusted for household composition according to the Statistics Sweden (*Statistiska centralbyrån SCB*). The adjustment is made based on "Consumption units" that are weighted differently according to the table below. The Disposable household income is divided by the sum of these weights for that specific household.

| Consumption unit                           | Weight |
|--------------------------------------------|--------|
| Single                                     | 1.00   |
| Cohabiting couple                          | 1.51   |
| Additional adult                           | 0.60   |
| First child 0-19 years old                 | 0.52   |
| Second and subsequent child 0-19 years old | 0.42   |
